# Supplementary material for: Effects of mono- or di-fluoro-substitution on spin crossover behavior in a pair of Schiff base-like FeII-coordination polymers
Source: Royal Society of Chemistry journal article supplement (doi:10.1039/d4dt01103a), 2024-01-01
Supplement: d4dt01103a1.pdf [file d4dt01103a1.pdf]

## **Effects of *mono-* or *di-*fluoro-substitution on spin crossover behaviour in a pair of Schiff base Fe<sup>II</sup>-coordination Polymer**

Yu Luo <sup>a#</sup>, Ren-He Zhou <sup>a#</sup>, Zhen Shao <sup>a</sup>, Dan Liu <sup>a</sup>, Han-Han Lu <sup>a</sup>, Meng-Jia Shang <sup>a</sup>, Liang Zhao <sup>\*a</sup>, Tao Liu <sup>a</sup>, Yin-Shan Meng <sup>\*a</sup>

<sup>a</sup> *State Key Laboratory of Fine Chemicals, Frontier Science Center for Smart Materials, School of Chemical Engineering, Dalian University of Technology, 2 Linggong Road, Dalian 116024, China.*

\*Corresponding authors. E-mail: [zhaoliang716@dlut.edu.cn](mailto:zhaoliang716@dlut.edu.cn) (L. Zhao), [mengys@dlut.edu.cn](mailto:mengys@dlut.edu.cn) (Y. S.

Meng)

## Contents

|                                                                                                                                                                                                |    |
|------------------------------------------------------------------------------------------------------------------------------------------------------------------------------------------------|----|
| Experimental section.....                                                                                                                                                                      | 1  |
| <b>Table S1.</b> Crystallographic data of complexes .....                                                                                                                                      | 3  |
| <b>Table S2.</b> Selected bond lengths (Å) for <b>1</b> at different temperatures .....                                                                                                        | 4  |
| <b>Table S3.</b> Selected bond lengths (Å) for <b>2</b> at 120 K.....                                                                                                                          | 5  |
| <b>Table S4.</b> Selected bond angles (°) for <b>1</b> at different temperatures. ....                                                                                                         | 6  |
| <b>Table S5.</b> Selected bond angles (°) for <b>2</b> at 120 K.....                                                                                                                           | 7  |
| <b>Fig. S1</b> TGA curve for complex <b>1</b> in N <sub>2</sub> atmosphere with a heating rate of 10 K·min <sup>-1</sup> .<br>.....                                                            | 8  |
| <b>Fig. S2</b> TGA curve for complex <b>2</b> in N <sub>2</sub> atmosphere with a heating rate of 10 K·min <sup>-1</sup> .<br>.....                                                            | 9  |
| <b>Fig. S3</b> The intermolecular C–H···π between adjacent chains and molecular packing of<br><b>1</b> .....                                                                                   | 10 |
| <b>Fig. S4</b> Overlay map of <b>1</b> and <b>2</b> . a) Fe1 of <b>2</b> , b) Fe2 of <b>2</b> .....                                                                                            | 11 |
| <b>Fig. S5</b> Plots of the temperature dependence of $\chi_M T$ under 1 kOe dc field for complexes<br>after loss solvent (a) <b>1</b> , (b) <b>2</b> .....                                    | 12 |
| <b>Fig. S6</b> Temperature-dependent susceptibilities of <b>1</b> with the temperature-sweeping rate<br>of 3 K/min over the temperature range of 2-300 K.....                                  | 13 |
| <b>Fig. S7</b> Scan rate study of temperature-dependent susceptibilities of <b>1</b> with the<br>temperature-sweeping rates of 1 and 3 K/min over the temperature range of 150-280 K.<br>..... | 14 |
| <b>Fig. S8</b> <sup>1</sup> H NMR spectrum of ligand <b>L</b> <sub>1</sub> (500 MHz) in CDCl <sub>3</sub> .....                                                                                | 15 |
| <b>Fig. S9</b> <sup>1</sup> H NMR spectrum of ligand <b>L</b> <sub>2</sub> (500 MHz) in CDCl <sub>3</sub> .....                                                                                | 16 |
| <b>Fig. S10</b> IR spectra of ligand (a) <b>L</b> <sub>1</sub> ; (b) <b>L</b> <sub>2</sub> . ....                                                                                              | 17 |
| <b>Fig. S11</b> The asymmetric unit of complex <b>1</b> (a) at 120 K; (b) at 300 K. ....                                                                                                       | 18 |
| <b>Fig. S12</b> The asymmetric unit of complex <b>2</b> at 120 K.....                                                                                                                          | 19 |

## Experimental section.

All reagents were commercially available and used without further purification.  $H_2L$  and  $FeL(MeOH)_2$  were synthesized according to a procedure in the literature.

### Synthesis of organic ligand $L_1$ (2,3-FDPB):

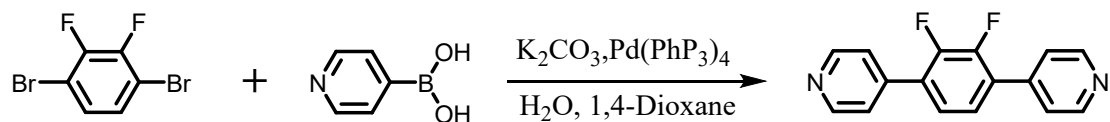

4-pyridylboronic acid (1.35 g, 11 mmol), potassium carbonate (2.54 g, 18 mmol), and  $Pd(PPh_3)_4$  (0.50 g, 0.433 mmol) were added to the reaction flask, and 1,4-dibromo-2,3-difluorobenzene (1.0 g, 3.7 mmol) was added under  $N_2$  protection. A mixture of solvent water and 1,4-dioxane (10 mL of water, 20 mL of 1,4-dioxane) was added to the reaction flask. The mixture was stirred and heated to  $90^\circ C$ , and reacted for 72 hours to obtain the reaction product mixture. The mixture was cooled to room temperature and concentrated under reduced pressure. The concentrated solution of the reaction product was extracted three times with ethyl acetate (20 mL each time). The organic layer was dried with anhydrous  $MgSO_4$  and the solvent was removed to obtain the crude product. The crude product was separated by using a silicone chromatography column (the eluent is a mixture of petroleum ether and ethyl acetate, with a volume ratio of 2:1), and obtained a white solid 4'- (2,5-difluoro-1,4-phenylene) dipyridine 0.7 g (with a yield of 35.14%).  $^1H$  NMR (500 MHz,  $CDCl_3$ ):  $\delta$  8.78-8.72 (m, 4H), 7.58-7.50 (m, 4H), 7.40-7.33 (m, 2H). Anal. Calcd (%) for  $L_1$ : C, 76.79; H, 4.43; N, 11.19. Found: C, 76.92; H, 4.51; N, 11.35.

### Synthesis of organic ligand L<sub>2</sub> (2 - FDPB):

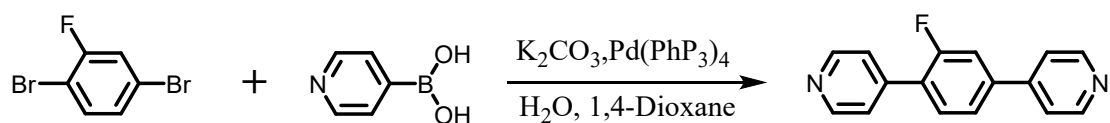

1,4-dibromo-2-difluorobenzene (0.93 g, 3.7 mmol), 4-pyridylboronic acid (1.35 g, 11 mmol), potassium carbonate (2.54 g, 18 mmol) and Pd (PPh<sub>3</sub>)<sub>4</sub> (0.50 g, 0.433 mmol) were added to the reaction flask under N<sub>2</sub> protection, respectively. A mixture solution of water and 1,4-dioxane (10mL water, 20 mL 1,4-dioxane) was added to the reaction flask. The mixture was stirred and heated to 90 °C, and reacted for 72 hours to obtain the reaction product mixture. The mixture was cooled to room temperature and concentrated under reduced pressure. The concentrated solution of the reaction product was extracted three times with ethyl acetate (20 mL each time). The organic layer was dried with anhydrous MgSO<sub>4</sub> and the solvent was removed to obtain the crude product. The crude product was separated by using a silicone chromatography column (the eluent is a mixture of petroleum ether and ethyl acetate, with a volume ratio of 2:1), and obtained a white solid 4'-(2-fluoro-1,4-phenylene) dipyridine 0.6 g (with a yield of 40.52%). <sup>1</sup>H NMR(500 MHz, CDCl<sub>3</sub>): δ 8.76-8.68(m, 4H), 7.64-7.46(m,7H). Anal. Calcd (%) for L<sub>2</sub>: C, 71.64; H, 3.76; N, 10.44. Found: C, 71.80; H, 3.89; N, 10.68.

**Table S1.** Crystallographic data of complexes

| Complex                          | <b>1</b>                               |             | <b>2</b>                           |
|----------------------------------|----------------------------------------|-------------|------------------------------------|
| Temperature, K                   | 120                                    | 300         | 120                                |
| CCDC                             | 2347760                                | 2347761     | 2347771                            |
| Formula                          | $C_{36.25}H_{30.5}Cl_{0.5}F_4FeN_4O_6$ |             | $C_{72.5}H_{64}F_6Fe_2N_8O_{12.5}$ |
| Formula weight                   | 767.72                                 |             | 1473.01                            |
| Crystal system                   | monoclinic                             |             | triclinic                          |
| Space group                      | $P2_1/n$                               | $P2_1/n$    | $P\bar{1}$                         |
| $a/\text{\AA}$                   | 15.418(2)                              | 15.877(2)   | 12.217(5)                          |
| $b/\text{\AA}$                   | 12.9986(18)                            | 13.1330(16) | 13.650(8)                          |
| $c/\text{\AA}$                   | 17.693(2)                              | 17.844(2)   | 23.294(9)                          |
| $\alpha/^\circ$                  | 90                                     | 90          | 97.356(15)                         |
| $\beta/^\circ$                   | 99.066(3)                              | 95.284(4)   | 93.002(12)                         |
| $\gamma/^\circ$                  | 90                                     | 90          | 107.035(17)                        |
| Volume/ $\text{\AA}^3$           | 3501.6(8)                              | 3705.0(8)   | 3667(3)                            |
| $Z$                              | 4                                      | 4           | 2                                  |
| $\rho_{\text{calc}}/\text{cm}^3$ | 1.456                                  | 1.338       | 1.334                              |
| $F(000)$                         | 1578                                   | 1536        | 1522                               |
| Reflections collected            | 61483                                  | 78147       | 83808                              |
| Goodness-of-fit on $F^2$         | 1.068                                  | 1.040       | 1.036                              |
| $R_1 [I \geq 2\sigma(I)]^a$      | 0.0443                                 | 0.0668      | 0.0897                             |
| $wR_2 [I \geq 2\sigma(I)]^b$     | 0.1124                                 | 0.1957      | 0.2439                             |

$$^a R_1 = \sum (|F_o| - |F_c|) / \sum |F_o|; \quad ^b wR_2 = [\sum w (|F_o| - |F_c|)^2 / \sum w F_o^2]^{1/2}$$

**Table S2.** Selected bond lengths (Å) for **1** at different temperatures

|        | 120 K      | 300 K      |
|--------|------------|------------|
|        | Length (Å) | Length (Å) |
| Fe1–O1 | 1.9307(15) | 2.033(3)   |
| Fe1–O2 | 1.9420(14) | 2.009(3)   |
| Fe1–N1 | 1.9046(17) | 2.109(3)   |
| Fe1–N2 | 1.9084(17) | 2.107(3)   |
| Fe1–N3 | 1.9838(17) | 2.227(3)   |
| Fe1–N4 | 1.9977(17) | 2.260(2)   |

**Table S3.** Selected bond lengths (Å) for **2** at 120 K

|                     | 120 K     |
|---------------------|-----------|
|                     | Length(Å) |
| Fe1–O1              | 1.936(4)  |
| Fe1–O2              | 1.927(4)  |
| Fe1–N1              | 1.905(5)  |
| Fe1–N2              | 1.900(5)  |
| Fe1–N3              | 1.988(5)  |
| Fe1–N4 <sup>2</sup> | 1.992(5)  |
| Fe2–O3              | 1.941(4)  |
| Fe2–O4              | 1.942(4)  |
| Fe2–N5              | 1.906(5)  |
| Fe2–N6              | 1.899(5)  |
| Fe2–N7              | 2.002(5)  |
| Fe2–N8 <sup>1</sup> | 2.005(5)  |

**Table S4.** Selected bond angles (°) for **1** at different temperatures.

| Complex              | <b>1</b>  |            |
|----------------------|-----------|------------|
| Temperature (K)      | 120       | 300        |
| O1–Fe1–O2            | 87.93(6)  | 111.27(11) |
| O1–Fe1–N1            | 93.70(7)  | 84.77(11)  |
| O1–Fe1–N2            | 177.91(7) | 163.45(11) |
| O1–Fe1–N3            | 88.53(6)  | 87.69(10)  |
| O1–Fe1–N4            | 87.40(6)  | 85.68(10)  |
| O2–Fe1–N1            | 178.25(7) | 163.62(11) |
| O2–Fe1–N2            | 93.25(7)  | 85.28(11)  |
| O2–Fe1–N3            | 88.72(6)  | 91.01(10)  |
| O2–Fe1–N4            | 87.37(6)  | 88.36(10)  |
| N1–Fe1–N2            | 85.15(7)  | 78.73(11)  |
| N1–Fe1–N3            | 91.98(7)  | 93.00(10)  |
| N1–Fe1–N4            | 92.04(7)  | 89.65(10)  |
| N2–Fe1–N3            | 89.77(7)  | 91.86(10)  |
| N2–Fe1–N4            | 94.37(7)  | 95.44(10)  |
| N3–Fe1–N4            | 174.47(7) | 172.60(10) |
| $\Sigma_{\text{Fe}}$ | 30.46     | 62.42      |
| CShM <sub>Fe</sub>   | 0.183     | 1.479      |



**Table S5.** Selected bond angles (°) for **2** at 120 K.

| Complex                |            | <b>2</b>               |            |
|------------------------|------------|------------------------|------------|
| Temperature (K)        |            | 120                    |            |
| O1–Fe1–O2              | 87.34(17)  | O3–Fe2–O4              | 89.03(17)  |
| O1–Fe1–N1              | 93.43(19)  | O3–Fe2–N5              | 92.61(18)  |
| O1–Fe1–N2              | 178.85(19) | O3–Fe2–N6              | 177.72(18) |
| O1–Fe1–N3              | 88.85(18)  | O3–Fe2–N7              | 87.57(18)  |
| O1–Fe1–N4 <sup>2</sup> | 88.84(18)  | O3–Fe2–N8 <sup>1</sup> | 89.48(18)  |
| O2–Fe1–N1              | 178.73(19) | O4–Fe2–N5              | 177.09(19) |
| O2–Fe1–N2              | 93.78(19)  | O4–Fe2–N6              | 92.95(19)  |
| O2–Fe1–N3              | 88.91(18)  | O4–Fe2–N7              | 87.35(18)  |
| O2–Fe1–N4 <sup>2</sup> | 87.92(18)  | O4–Fe2–N8 <sup>1</sup> | 91.04(18)  |
| N1–Fe1–N2              | 85.5(2)    | N5–Fe2–N6              | 85.4(2)    |
| N1–Fe1–N3              | 92.1(2)    | N5–Fe2–N7              | 90.32(19)  |
| N1–Fe1–N4 <sup>2</sup> | 91.1(2)    | N5–Fe2–N8              | 91.37(19)  |
| N2–Fe1–N3              | 90.9(2)    | N6–Fe2–N7              | 93.6(2)    |
| N2–Fe1–N4 <sup>2</sup> | 91.5(2)    | N6–Fe2–N8              | 89.4(2)    |
| N3–Fe1–N4 <sup>2</sup> | 176.16(19) | N7–Fe2–N8              | 176.67(18) |
| $\Sigma_{\text{Fe}}$   | 25.50      | $\Sigma_{\text{Fe}}$   | 23.64      |
| CShM <sub>Fe</sub>     | 0.136      | CShM <sub>Fe</sub>     | 0.156      |

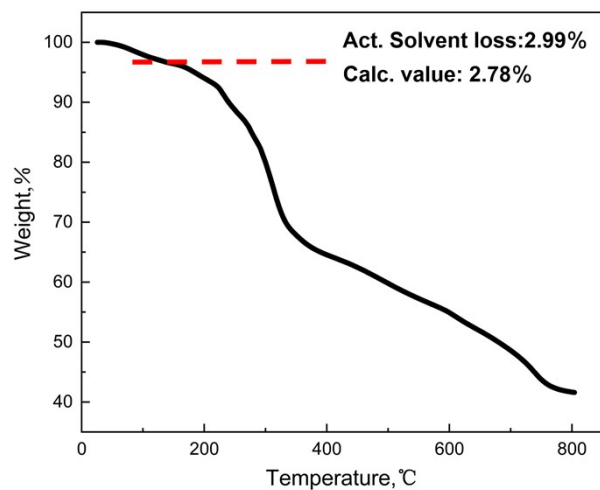

**Fig. S1** TGA curve for complex **1** in N<sub>2</sub> atmosphere with a heating rate of 10 K·min<sup>-1</sup>.

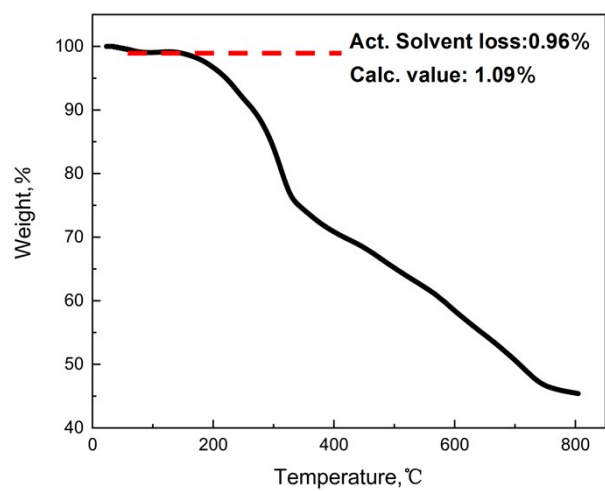

**Fig. S2** TGA curve for complex **2** in N<sub>2</sub> atmosphere with a heating rate of 10 K·min<sup>-1</sup>.

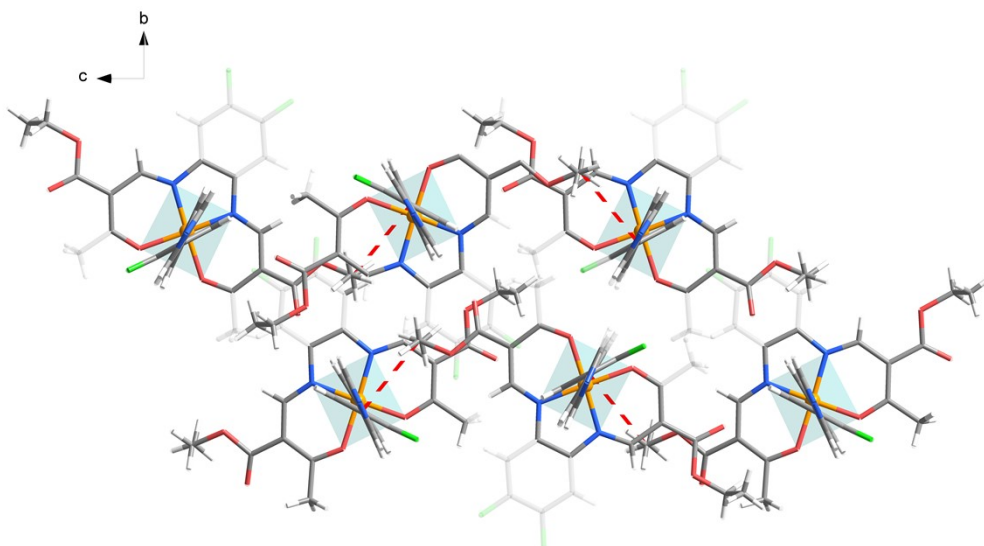

**Fig. S3** The intermolecular C–H··· $\pi$  between adjacent chains and molecular packing of **1**

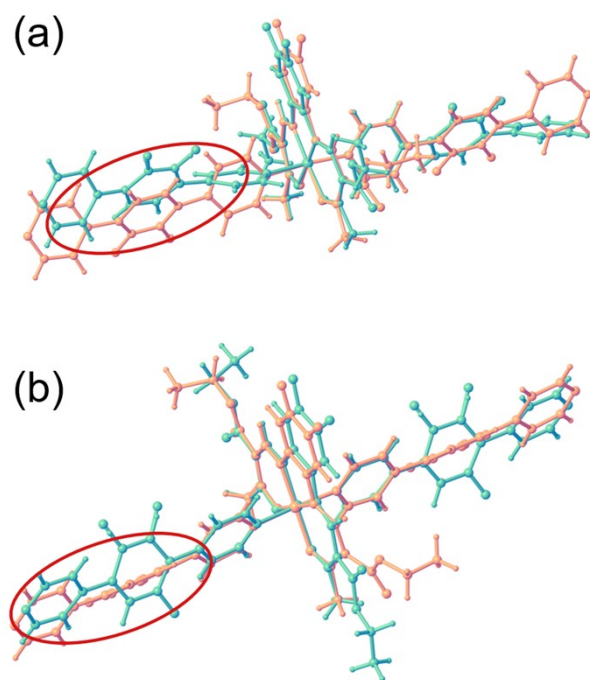

**Fig. S4** Overlay map of 1 and 2. a) Fe1 of 2, b) Fe2 of 2

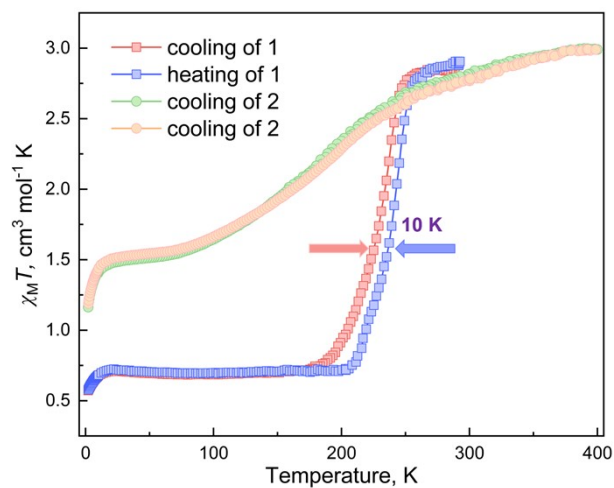

**Fig. S5** Plots of the temperature dependence of  $\chi_M T$  under 1 kOe dc field for complexes after loss solvent (a) **1**, (b) **2**. Fresh samples contained in the plastic capsule were heated to 120° for 5 hours under the nitrogen atmosphere. The nitrogen atmosphere was replaced every half hour to ensure that the solvents were completely removed.

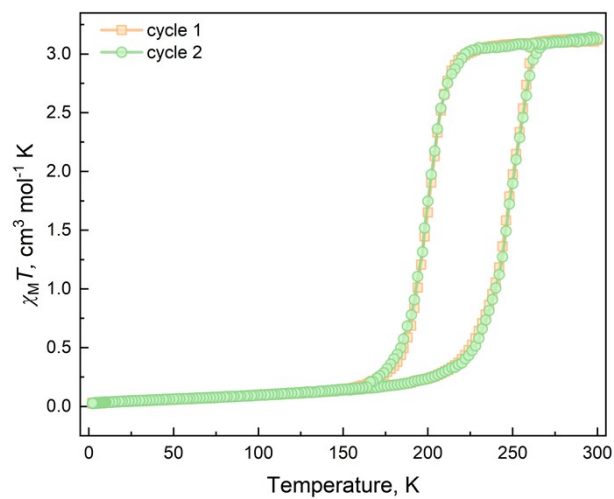

**Fig. S6** Temperature-dependent susceptibilities of **1** with the temperature-sweeping rate of 3 K/min over the temperature range of 2-300 K. The  $\chi_M T$  vs. T curves were repeated well, confirming that the solvent was well retained.

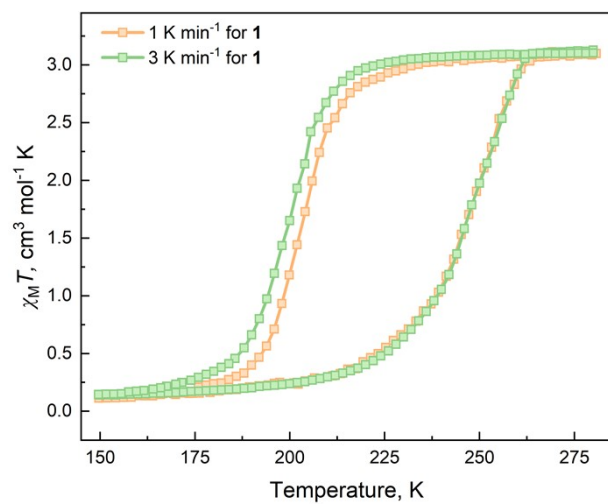

**Fig. S7** Scan rate study of temperature-dependent susceptibilities of **1** with the temperature-sweeping rates of 1 and 3 K/min over the temperature range of 150-280 K.



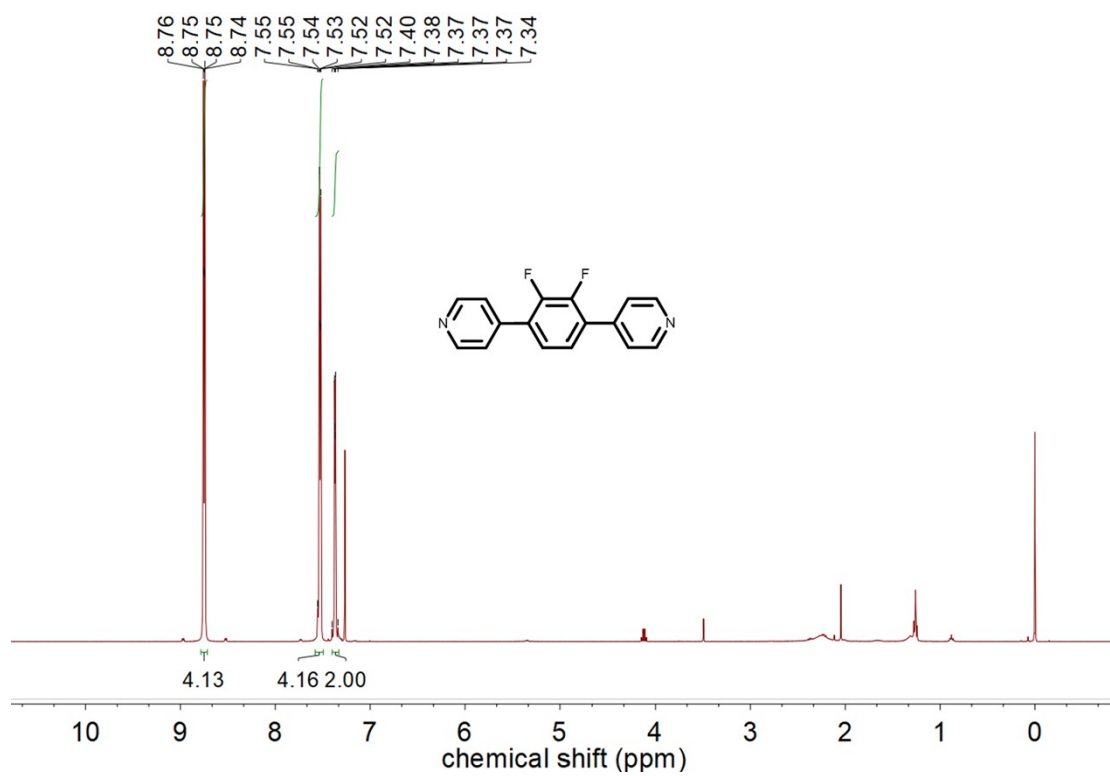

**Fig. S8**  $^1\text{H}$  NMR spectrum of ligand  $\text{L}_1$  (500 MHz) in  $\text{CDCl}_3$ .

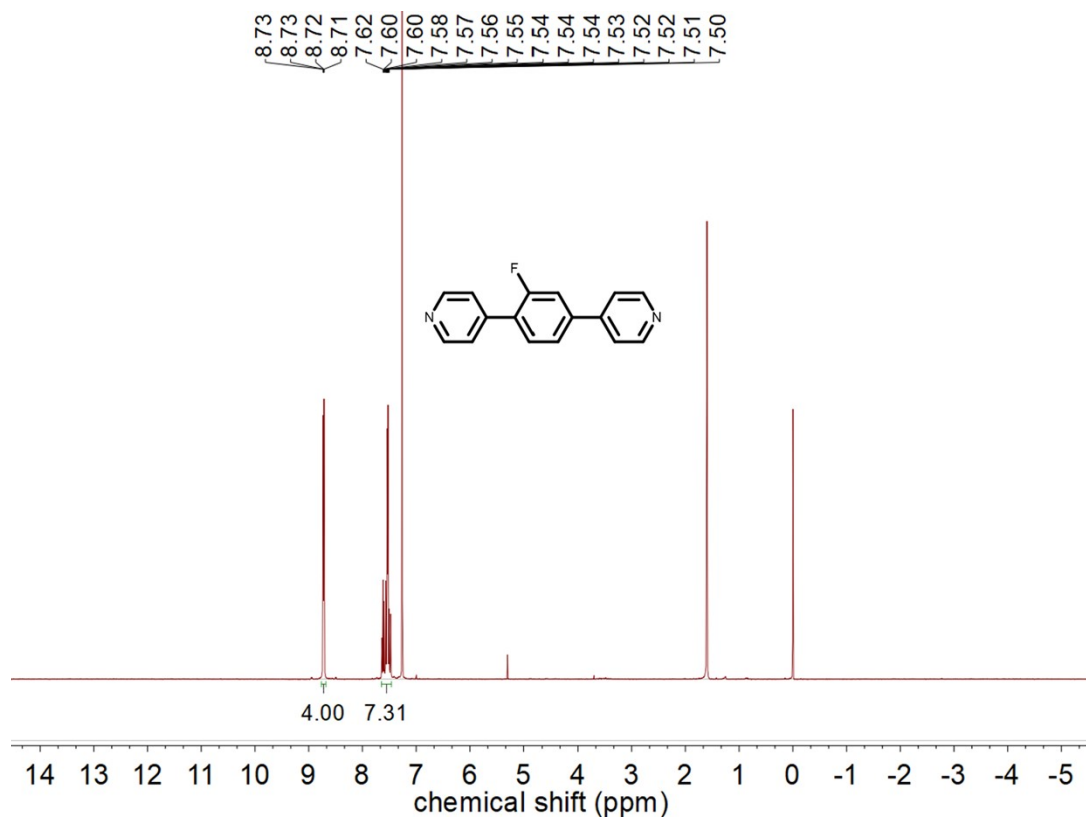

**Fig. S9** <sup>1</sup>H NMR spectrum of ligand **L**<sub>2</sub> (500 MHz) in CDCl<sub>3</sub>.

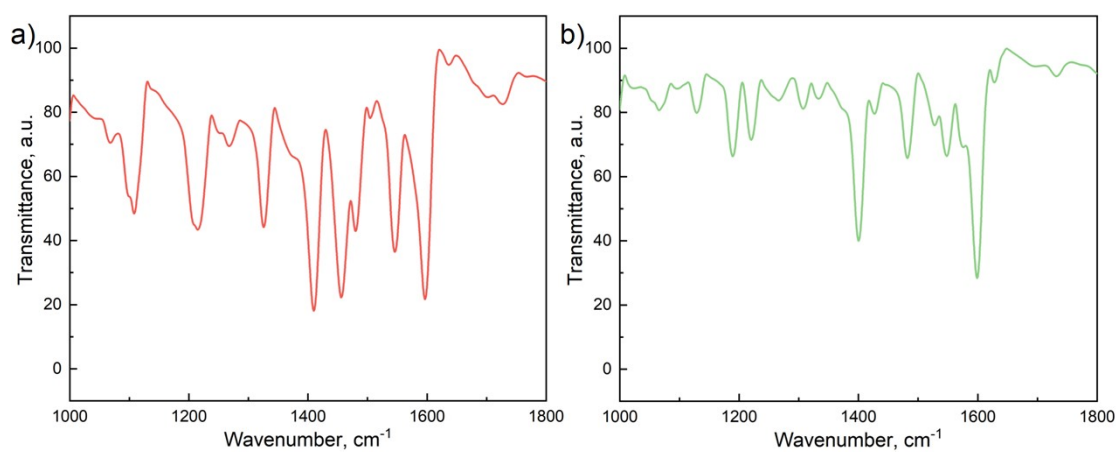

**Fig. S10** IR spectra of ligand (a) L<sub>1</sub>; (b) L<sub>2</sub>.

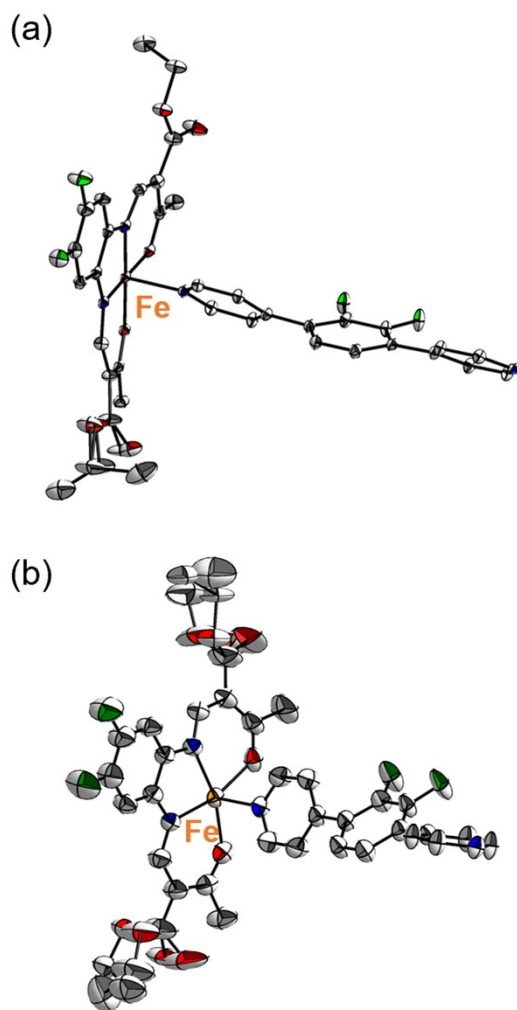

**Fig. S11** The asymmetric unit of complex **1** (a) at 120 K; (b) at 300 K. (ORTEP drawing, thermal ellipsoids at a 50% probability level. All the hydrogen atoms and solvents are omitted for clarity).

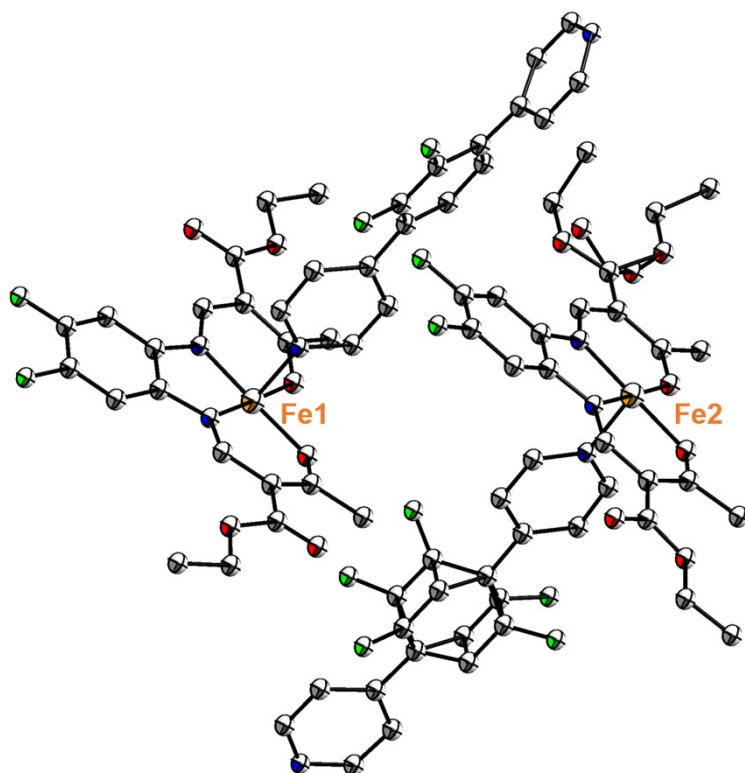

**Fig. S12** The asymmetric unit of complex **2** at 120 K. (ORTEP drawing, thermal ellipsoids at a 50% probability level. All the hydrogen atoms and solvents are omitted for clarity).
